# Supplementary material for: Optimization of Methane production from Cowpea Hull Anaerobic Co-Digestion: Moisture Content Reduction and Nanobubble Water Addition
Source: Research Square preprint supplement (doi:10.21203/rs.3.rs-3201453/v1), 2023-08-01
Supplement: Supplementary file 2 [file 27a4ba4da9eb4d9501fc9b93.docx]

**Highlights**

- Cowpea hull sustainable utilization technique for bioenergy production.
- Moisture content reduction (MCR) of cowpea hull as a pretreatment method for optimized biogas production.
- Optimization effect comparison between air and nitrogen nano-bubble water (NBW) addition on biogas and methane production.
- Quantification of electricity generation capacity of cowpea hull bio-gasification and potential national GHG emission reduction in Nigeria.
