# Supplementary figures and images for: Optimization of Methane production from Cowpea Hull Anaerobic Co-Digestion: Moisture Content Reduction and Nanobubble Water Addition
Source: Research Square preprint supplement (doi:10.21203/rs.3.rs-3201453/v1), 2023-08-01

**Graphical Abstract**


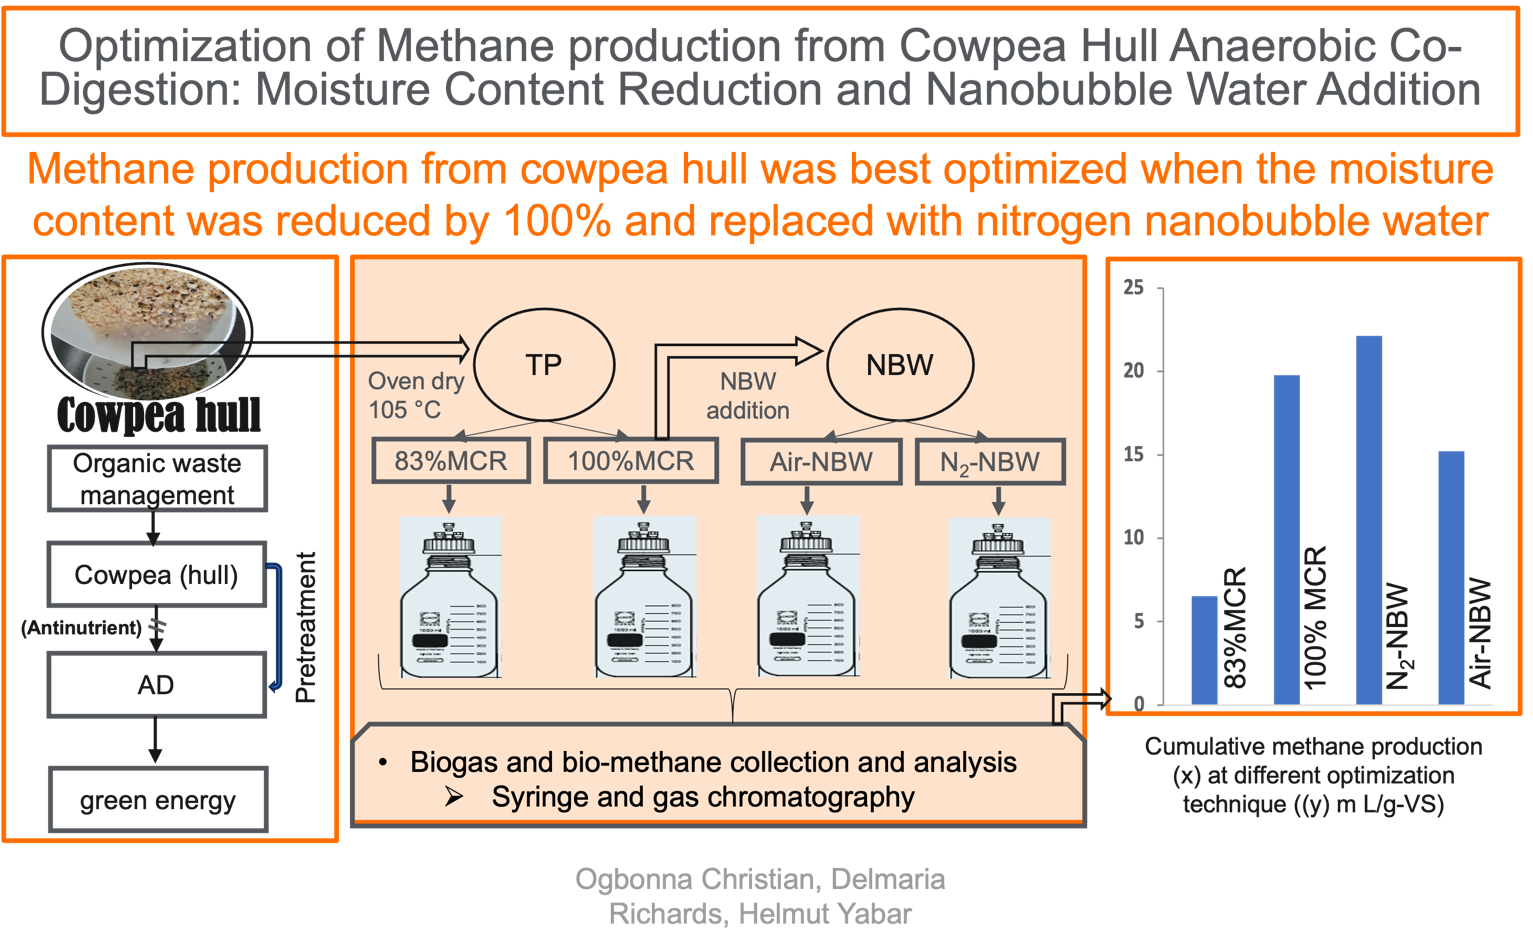

Supplement: Supplementary file 1 [file 26fc723210f648063419fa8c.docx]
